# Supplementary material for: Evaluation of neurofilament light chain in the cerebrospinal fluid and blood as a biomarker for neuronal damage in experimental pneumococcal meningitis
Source: PubMed Central journal article supplement (PMC7539528; doi:10.1186/s12974-020-01966-3), 2020-10-07

**A**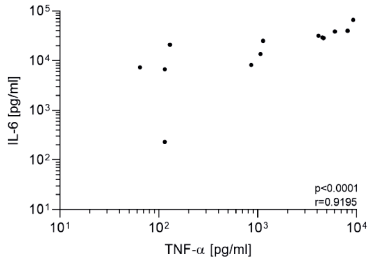**B**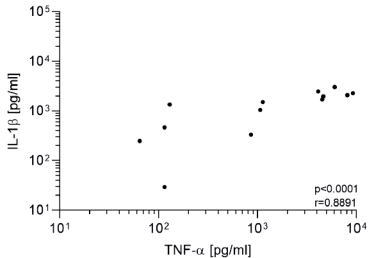**C**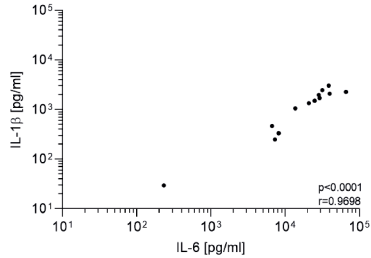

Supplement: 12974_2020_1966_MOESM1_ESM.pdf [file 12974_2020_1966_MOESM1_ESM.pdf]
